# Supplementary material for: Incorporation of redox-inactive cations promotes iron catalyzed aerobic C–H oxidation at mild potentials
Source: Royal Society of Chemistry journal article supplement (doi:10.1039/c7sc04486k), 2018-01-01
Supplement: c7sc04486k1.pdf [file c7sc04486k1.pdf]

Supplementary Information

**Incorporation of Redox-Inactive Cations Promotes Iron Catalyzed Aerobic C-H Oxidation  
at Mild Potentials**

Teera Chantarojsiri, Joseph W. Ziller, Jenny Y. Yang

**Table of Contents**

|                                                                                                                                                                                                                                                                                                          |    |
|----------------------------------------------------------------------------------------------------------------------------------------------------------------------------------------------------------------------------------------------------------------------------------------------------------|----|
| General Information & Synthesis .....                                                                                                                                                                                                                                                                    | 1  |
| Figure S1. Solid state structure of <b>2Ba</b> .....                                                                                                                                                                                                                                                     | 2  |
| Figure S2. Solid state structure of [ <b>3Ba</b> ] <sup>+</sup> .....                                                                                                                                                                                                                                    | 3  |
| Figure S3. Solid state structure of [ <b>4Ba</b> ] <sup>2+</sup> .....                                                                                                                                                                                                                                   | 3  |
| Figure S4. Solid state structure of <b>3K</b> .....                                                                                                                                                                                                                                                      | 4  |
| Figure S5. Solid state structure of <b>4K</b> .....                                                                                                                                                                                                                                                      | 4  |
| Table S1. Oxidation catalysis under rigorously dry conditions .....                                                                                                                                                                                                                                      | 5  |
| Figure S6. Comparison between oxidation reactivity in ambient and dry conditions .....                                                                                                                                                                                                                   | 5  |
| Figure S7. UV-vis spectra of <b>3K</b> (top), <b>3Ba</b> (middle), and Fe(Cl)(Ph <sub>2</sub> salenCl <sub>4</sub> ) ( <b>C</b> ) (bottom) with additional 10 equivalents of <i>tert</i> -BuOOH over 12 hours. Black trace represents t = 0 time point whereas blue trace represents the end point ..... | 6  |
| Figure S8. UV-vis spectra of aerobic oxidation of <b>2K</b> (top) and <b>2Ba</b> (bottom), under air at room temperature. Black trace represents t = 0 time point whereas blue trace represents the end point .....                                                                                      | 7  |
| Figure S9. UV-vis spectra of <b>4K</b> (top) and <b>4Ba</b> (bottom) .....                                                                                                                                                                                                                               | 8  |
| Figure S10. EPR spectra of <b>3K</b> (black), <b>3Ba</b> (red), and Fe(Cl)(Ph <sub>2</sub> salenCl <sub>4</sub> ) ( <b>C</b> ) (blue), showing characteristics of S = 5/2 Fe complexes .....                                                                                                             | 9  |
| Table S2. Crystal data and structure refinement for <b>2Ba</b> .....                                                                                                                                                                                                                                     | 10 |
| Table S3. Crystal data and structure refinement for <b>3K</b> .....                                                                                                                                                                                                                                      | 11 |
| Table S4. Crystal data and structure refinement for <b>3Ba</b> .....                                                                                                                                                                                                                                     | 12 |
| Table S5. Crystal data and structure refinement for <b>4K</b> .....                                                                                                                                                                                                                                      | 13 |
| Table S6. Crystal data and structure refinement for <b>4Ba</b> .....                                                                                                                                                                                                                                     | 14 |

## General Information & Synthesis

All reagents were purchased from commercial suppliers and used without purification. Unless otherwise noted, all organic chemical manipulations were performed in air. Cyclohexene was passed through a short basic alumina plug before catalytic studies to get rid of stabilizers. Compounds were purified via flash column chromatography using Sorbent Technologies 60 Å, 230–400 mesh silica gel, unless otherwise stated. Unless otherwise noted, inorganic metal complexations were performed in a Vacuum Atmospheres Co. drybox under a nitrogen atmosphere. Anhydrous solvents were sparged with UHP argon (Praxair) and passed through columns containing Q-5 and molecular sieves before use. <sup>1</sup>H NMR spectra were recorded at 500 MHz on Bruker instruments. <sup>1</sup>H NMR spectra chemical shifts are reported as δ values in ppm relative to residual protio solvent: CDCl<sub>3</sub> (7.26 ppm), CD<sub>3</sub>CN (1.94 ppm). Electrospray ionization mass spectra (ESI-MS) were obtained on a Micromass LCT and collected at the University of California-Irvine Mass Spectrometry Facility. Elemental analyses were performed on a Perkin Elmer 2400 Series II CHNS elemental analyzer. Ultraviolet-visible (UV-vis) spectra were collected in a 10 mm pathlength quartz cuvette or 1 mm pathlength, using an Agilent Technologies Cary 60 UV-vis spectrometer and 8453 Diode-array UV-vis spectrometer equipped with Unisoku cryostat.

Electrochemical experiments were performed under an atmosphere of nitrogen in a solution containing 0.2 M Bu<sub>4</sub>NPF<sub>6</sub> in acetonitrile. Glassy carbon was used as the working and auxiliary electrode and a silver wire was used as a pseudoreference electrode. Ferrocene and cobaltocene were used as internal standards, and all potentials are referenced to the ferrocenium/ferrocene couple. Cyclic voltammetry experiments were performed with a Pine Wavedriver 10 or 20 potentiostat and Pine Aftermath software version 1.2.7359.

### Synthesis of FeMsalen (2M)

In 5 mL CH<sub>3</sub>OH, **1M** (0.15 mmol, 1 equiv) and Fe(OAc)<sub>2</sub> (28.5 mg, 0.165 mmol, 1.1 equiv) were dissolved and heated at 65°C for 1 h. The reaction changed color from yellow to dark brown. The volume was reduced under vacuum before recrystallization by Et<sub>2</sub>O diffusion. Crystals suitable for X-ray crystallography were obtained with Et<sub>2</sub>O diffusion into an CH<sub>3</sub>CN solution. **2K**: Yield 75.8 mg (77.3 %) ESI-MS *m/z* calcd C<sub>23</sub>H<sub>24</sub>F<sub>3</sub>FeKN<sub>2</sub>O<sub>9</sub>S 656.0 (M), found 656.0, Calcd C<sub>23</sub>H<sub>24</sub>F<sub>3</sub>FeKN<sub>2</sub>O<sub>9</sub>S (656.45 g·mol<sup>-1</sup>): C, 42.08; H, 3.69; N, 4.27. Found: C, 41.86; H, 3.31; N, 4.09. **2Ba**: Yield 114.8 mg (85.0 %) ESI-MS *m/z* calcd [C<sub>24</sub>H<sub>27</sub>BaF<sub>3</sub>FeN<sub>2</sub>O<sub>10</sub>S]<sup>+</sup> 786.0 (M-CF<sub>3</sub>SO<sub>3</sub><sup>-</sup>+CH<sub>3</sub>O<sup>-</sup>), found 785.9, Calcd C<sub>24</sub>H<sub>24</sub>F<sub>6</sub>FeBaN<sub>2</sub>O<sub>12</sub>S<sub>2</sub> (903.74 g·mol<sup>-1</sup>): C, 31.90; H, 2.68; N, 3.10. Found: C, 32.18; H, 2.72; N, 2.87.

### Synthesis of FeClMsalen (3M)

In 5 mL EtOH, **1M** (0.1 mmol, 1 equiv), FeCl<sub>3</sub> (18 mg, 0.11 mmol, 1.1 equiv), and triethylamine (30 μL, 0.2 mmol, 2 equiv) were dissolved and heated at 80°C for 1 h. The reaction changed color from yellow to dark brown with precipitate. The precipitate was collected after vacuum filtration. Crystals suitable for X-ray crystallography were obtained with Et<sub>2</sub>O diffusion into an CH<sub>3</sub>CN solution. **3K**: Yield 53.8 mg (77.8 %) ESI-MS *m/z* calcd C<sub>22</sub>H<sub>24</sub>ClFeKN<sub>2</sub>O<sub>6</sub> 542.0 (M-CF<sub>3</sub>SO<sub>3</sub><sup>-</sup>), found 542.0, Calcd C<sub>23</sub>H<sub>24</sub>ClF<sub>3</sub>FeKN<sub>2</sub>O<sub>9</sub>S (691.90 g·mol<sup>-1</sup>): C, 39.93; H, 3.50; N, 4.05. Found: C, 40.21; H, 3.56; N, 3.83. **3Ba**: Yield 32.0 mg (34.0 %) ESI-MS *m/z* calcd [C<sub>23</sub>H<sub>27</sub>BaClFeN<sub>2</sub>O<sub>7</sub>]<sup>+</sup> 671.9 (M-CF<sub>3</sub>SO<sub>3</sub><sup>-</sup>+CH<sub>3</sub>O<sup>-</sup>) found 671.9 Calcd C<sub>31</sub>H<sub>41</sub>BaClF<sub>6</sub>FeN<sub>3</sub>O<sub>14</sub>S<sub>2</sub> (1086.00 g·mol<sup>-1</sup>): C, 34.27; H, 3.80; N, 3.87. Found: C, 34.36; H, 3.64; N, 3.65.

### Synthesis of [Fe<sub>2</sub>(μ-Oxo) (salenM)<sub>2</sub>] (**4M**)

In 2 mL CH<sub>3</sub>CN, **2M** (0.033 mmol) were exposed to air overnight. The resulting solution was recrystallized. Crystals suitable for X-ray crystallography were obtained with Et<sub>2</sub>O diffusion into an CH<sub>3</sub>CN solution. **4K**: Yield 29.3 mg (87.7 %) ESI-MS *m/z* calcd for C<sub>45</sub>H<sub>48</sub>F<sub>3</sub>Fe<sub>2</sub>K<sub>2</sub>N<sub>4</sub>O<sub>16</sub>S<sub>1</sub><sup>+</sup> 1179.1 (M-CF<sub>3</sub>SO<sub>3</sub>) found 1179.1, Calcd C<sub>46</sub>H<sub>48</sub>F<sub>6</sub>Fe<sub>2</sub>K<sub>2</sub>N<sub>4</sub>O<sub>19</sub>S<sub>2</sub> (1328.90 g·mol<sup>-1</sup>): C, 41.58; H, 3.64; N, 4.22. Found: C, 41.49; H, 3.39; N, 4.10. **4Ba**: Yield 40.7 mg (88.9 %) *m/z* calcd C<sub>47</sub>H<sub>48</sub>Ba<sub>2</sub>F<sub>9</sub>Fe<sub>2</sub>N<sub>4</sub>O<sub>22</sub>S<sub>3</sub><sup>+</sup> 1674.9 (M-CF<sub>3</sub>SO<sub>3</sub><sup>-</sup>), found 1674.7 Calcd C<sub>48</sub>H<sub>56</sub>Ba<sub>2</sub>F<sub>12</sub>Fe<sub>2</sub>N<sub>4</sub>O<sub>29</sub>S<sub>4</sub> (1895.54 g·mol<sup>-1</sup>): C, 30.41; H, 2.98; N, 2.96. Found: C, 30.26; H, 2.99; N, 3.25.

### General Procedure for NMR Experiments

An O<sub>2</sub> saturated solution (0.25 mL) of 1 M cyclohexene and 20 mM benzene, as an internal standard, in CD<sub>3</sub>CN was mixed with an O<sub>2</sub> saturated solution (0.25 mL) of 1 mM Fe complexes (or blank solution in the control experiments) in an NMR tube. The headspace was topped off with extra O<sub>2</sub> and tightly capped. NMR spectra were taken 24 hours after with a long delay time (12.6 seconds).

### Solid State Structures

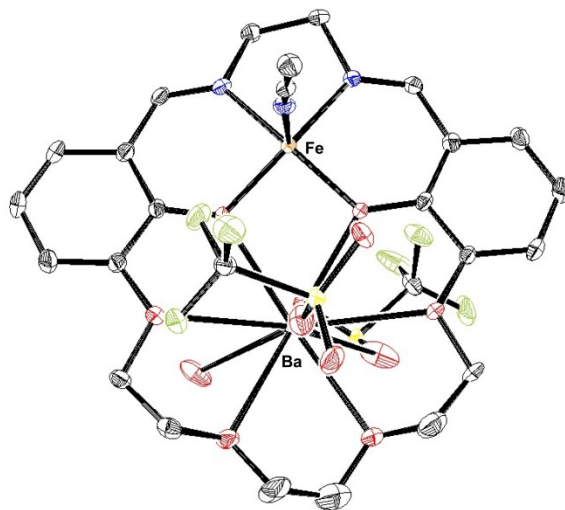

**Figure S1.** Solid state structure of **2Ba**. Ellipsoids were drawn at 50% probability

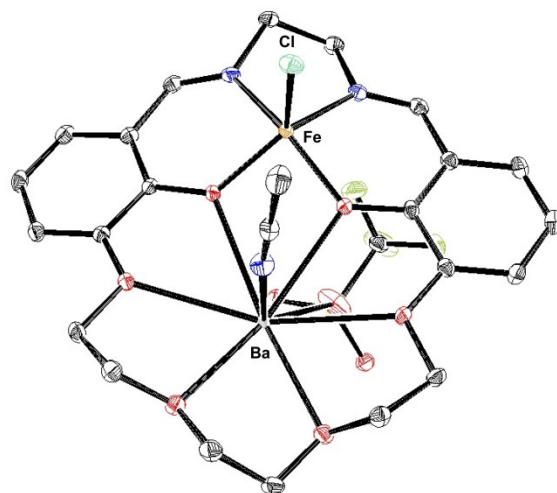

**Figure S2.** Solid state structure of  $[3\text{Ba}]^+$ . Outer sphere trifluoromethanesulfonate (OTf) anion is omitted for clarity. Ellipsoids are drawn at 50% probability.

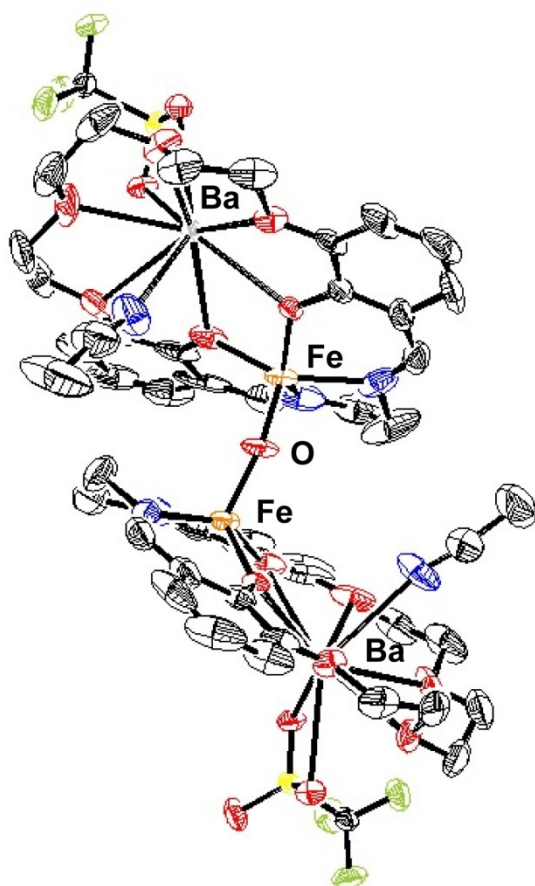

**Figure S3.** Solid state structure of  $[4\text{Ba}]^{2+}$ . Outer sphere trifluoromethanesulfonate (OTf) anions are omitted for clarity. Ellipsoids are drawn at 50% probability.

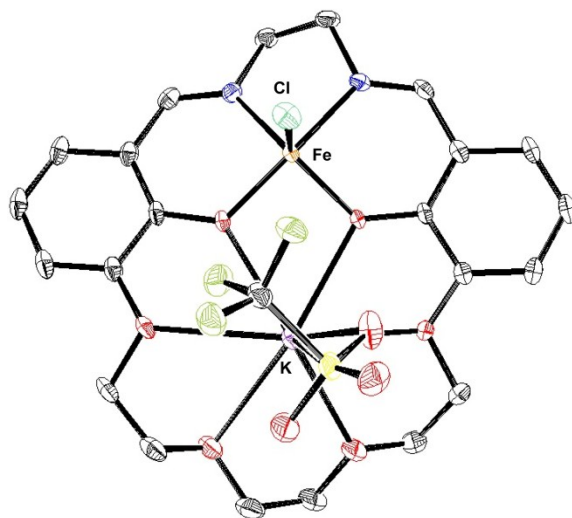

**Figure S4.** Solid state structure of **3K**. Ellipsoids are drawn at 50% probability.

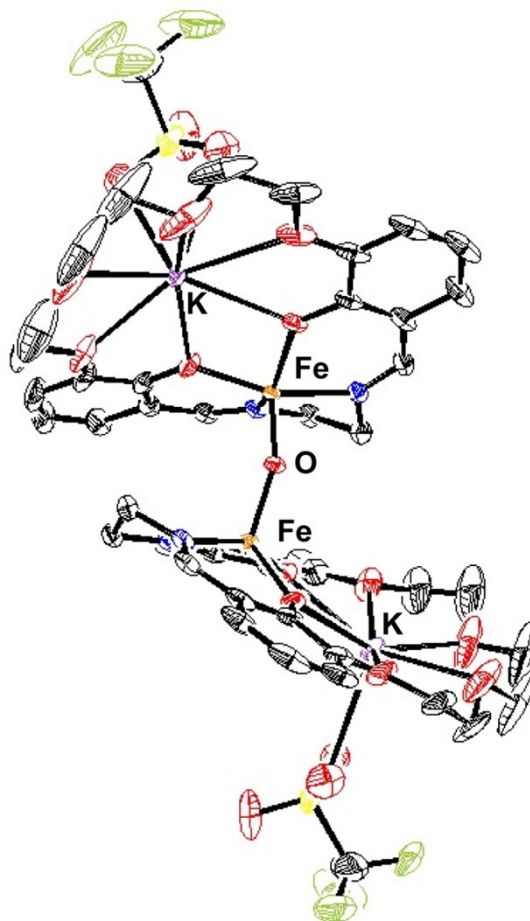

**Figure S5.** Solid state structure of **4K** (connectivity only). Ellipsoids are drawn at 50% probability.

**Table S1.** Oxidation catalysis under rigorously dry conditions.

| Complexes            | Cyclohexene Hydroperoxide (mM) | Cyclohexenol (mM) | Cyclohexenone (mM) | Turnover Number* |
|----------------------|--------------------------------|-------------------|--------------------|------------------|
| <b>3K</b>            | 5.0                            | 4.6               | 7.5                | 39.2             |
| <b>3Ba</b>           | 2.7                            | 3.2               | 10.6               | 48.6             |
| <b>C</b>             | 0                              | 0.35              | 0                  | 0.7              |
| <b>No Fe control</b> | 1                              | 0.4               | 0                  | 0.8              |

\*-OOH was not counted toward turnover number

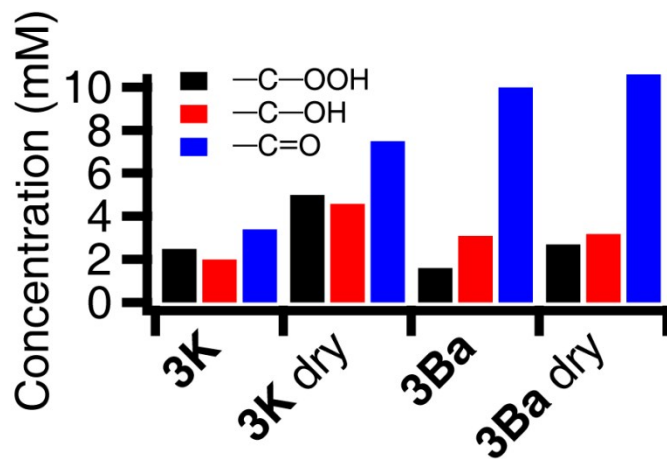

**Figure S6.** Comparison between oxidation reactivity in ambient and dry conditions.

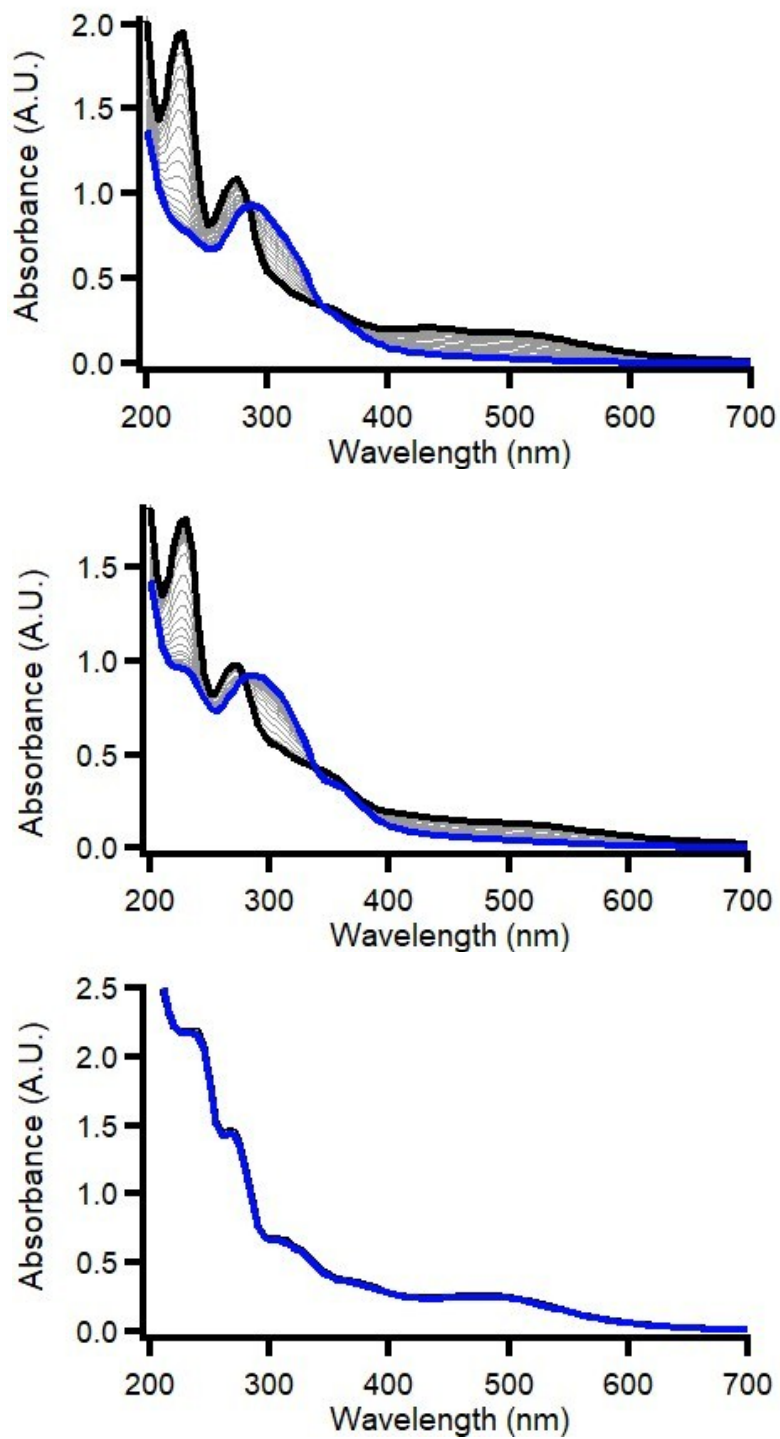

**Figure S7.** UV-vis spectra of **3K** (top), **3Ba** (middle), and Fe(Cl)(Ph<sub>2</sub>salenCl<sub>4</sub>) (**C**) (bottom) with additional 10 equivalents of *tert*-BuOOH over 12 hours. Black trace represents *t* = 0 time point whereas blue trace represents the end point.

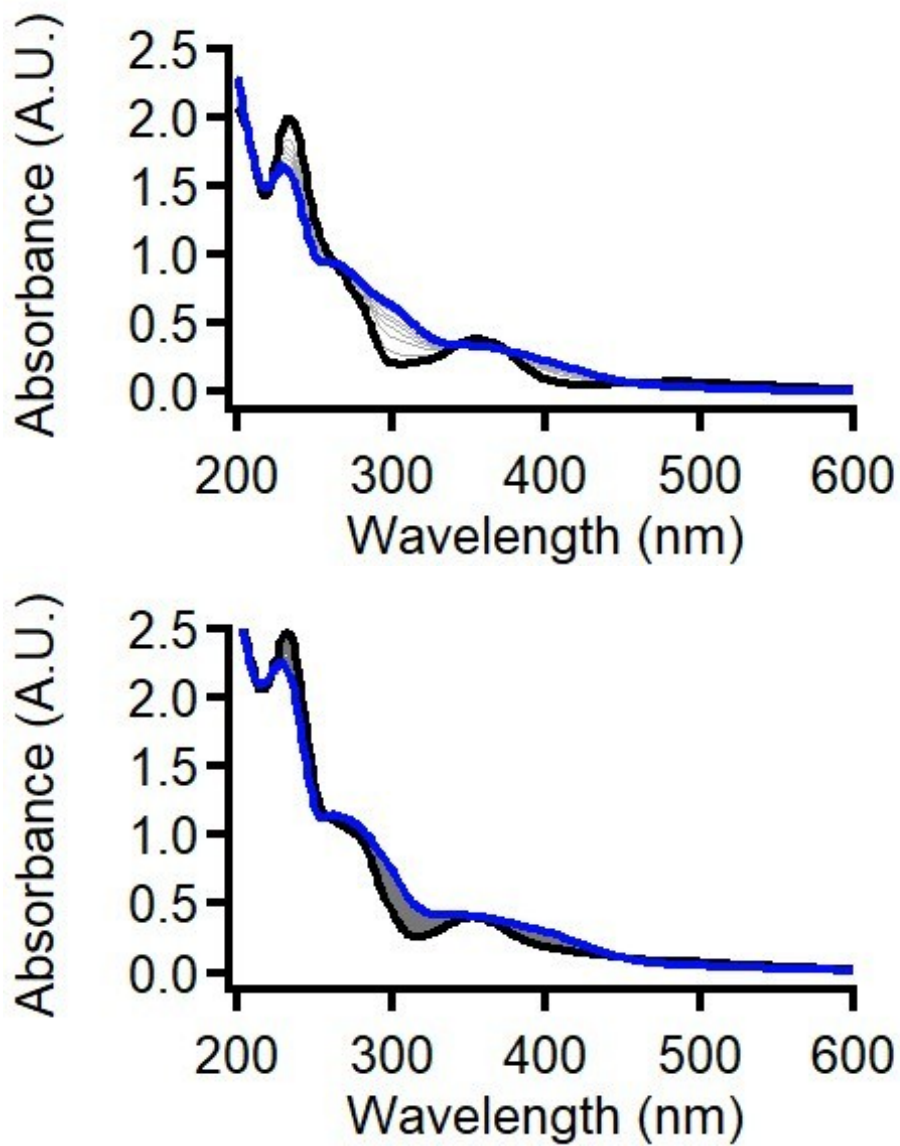

**Figure S8.** UV-vis spectra of aerobic oxidation of **2K** (top) and **2Ba** (bottom), under air at room temperature. Black trace represents  $t = 0$  time point whereas blue trace represents the end point.



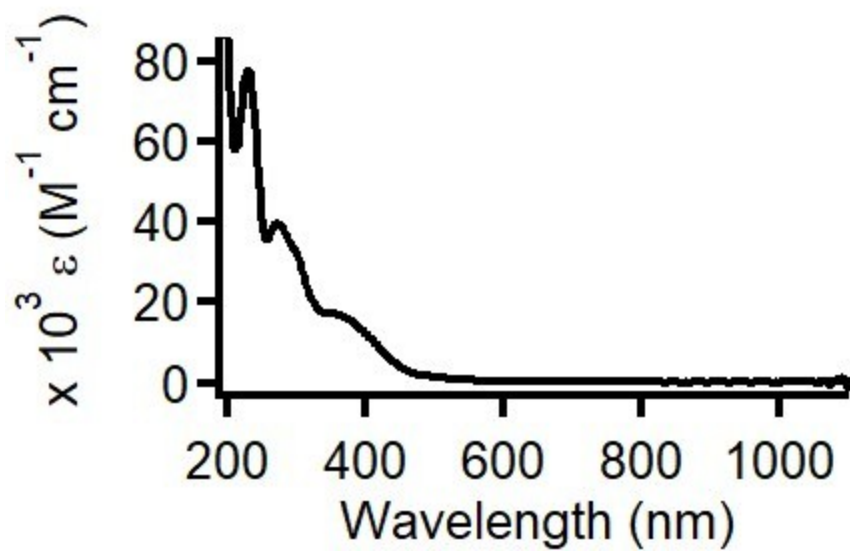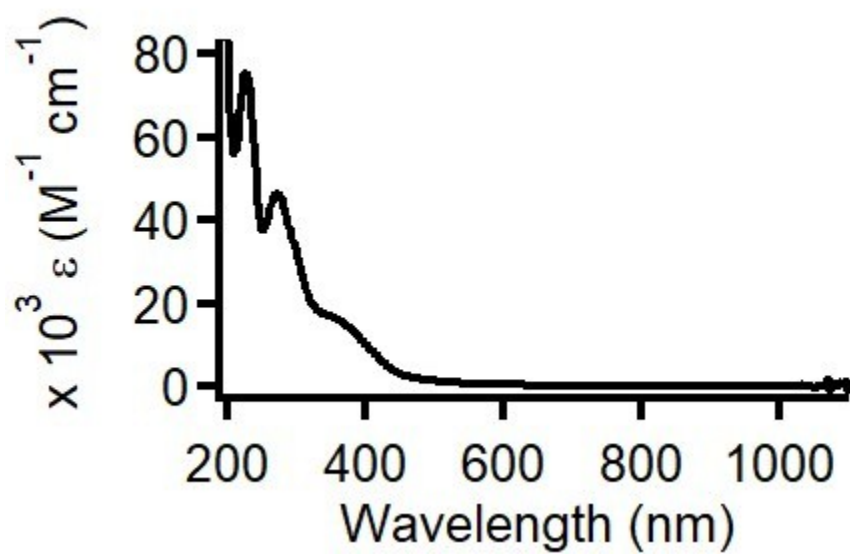

**Figure S9.** UV-vis spectra of **4K** (top) and **4Ba** (bottom)

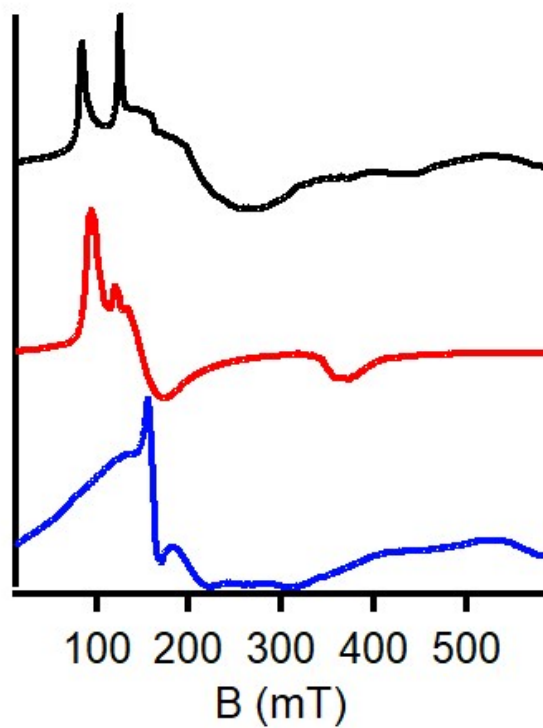

**Figure S10.** EPR spectra of **3K** (black), **3Ba** (red), and  $\text{Fe}(\text{Cl})(\text{Ph}_2\text{salenCl}_4)$  (**C**) (blue), showing characteristics of  $S = 5/2$  Fe complexes.

**Table S2.** Crystal data and structure refinement for **2Ba**.

|                                         |                                                                                                                                                                                        |
|-----------------------------------------|----------------------------------------------------------------------------------------------------------------------------------------------------------------------------------------|
| Empirical formula                       | $C_{52} H_{54} Ba_2 F_{12} Fe_2 N_6 O_{24} S_4$                                                                                                                                        |
| Formula weight                          | 1889.63                                                                                                                                                                                |
| Temperature                             | 88(2) K                                                                                                                                                                                |
| Wavelength                              | 0.71073 Å                                                                                                                                                                              |
| Crystal system                          | Triclinic                                                                                                                                                                              |
| Space group                             | $P\bar{1}$                                                                                                                                                                             |
| Unit cell dimensions                    | $a = 10.8491(7) \text{ \AA}$ $\alpha = 75.9118(8)^\circ$ .<br>$b = 11.7518(8) \text{ \AA}$ $\beta = 86.5298(8)^\circ$ .<br>$c = 14.5176(10) \text{ \AA}$ $\gamma = 71.8096(8)^\circ$ . |
| Volume                                  | 1705.3(2) Å <sup>3</sup>                                                                                                                                                               |
| Z                                       | 1                                                                                                                                                                                      |
| Density (calculated)                    | 1.840 Mg/m <sup>3</sup>                                                                                                                                                                |
| Absorption coefficient                  | 1.792 mm <sup>-1</sup>                                                                                                                                                                 |
| F(000)                                  | 936                                                                                                                                                                                    |
| Crystal color                           | orange                                                                                                                                                                                 |
| Crystal size                            | 0.399 x 0.195 x 0.100 mm <sup>3</sup>                                                                                                                                                  |
| Theta range for data collection         | 1.877 to 29.047°                                                                                                                                                                       |
| Index ranges                            | $-14 \leq h \leq 14, -15 \leq k \leq 15, -19 \leq l \leq 19$                                                                                                                           |
| Reflections collected                   | 21189                                                                                                                                                                                  |
| Independent reflections                 | 8297 [R(int) = 0.0177]                                                                                                                                                                 |
| Completeness to theta = 25.500°         | 99.9 %                                                                                                                                                                                 |
| Absorption correction                   | Semi-empirical from equivalents                                                                                                                                                        |
| Max. and min. transmission              | 0.7458 and 0.6271                                                                                                                                                                      |
| Refinement method                       | Full-matrix least-squares on F <sup>2</sup>                                                                                                                                            |
| Data / restraints / parameters          | 8297 / 0 / 499                                                                                                                                                                         |
| Goodness-of-fit on F <sup>2</sup>       | 1.034                                                                                                                                                                                  |
| Final R indices [I > 2σ(I) = 7734 data] | R1 = 0.0221, wR2 = 0.0542                                                                                                                                                              |
| R indices (all data, 0.73 Å)            | R1 = 0.0243, wR2 = 0.0554                                                                                                                                                              |
| Largest diff. peak and hole             | 1.316 and -0.511 e.Å <sup>-3</sup>                                                                                                                                                     |

**Table S3.** Crystal data and structure refinement for **3K**.

|                                         |                                                                                                      |
|-----------------------------------------|------------------------------------------------------------------------------------------------------|
| Empirical formula                       | C23 H24 Cl F3 Fe K N2 O9 S                                                                           |
| Formula weight                          | 691.90                                                                                               |
| Temperature                             | 128(2) K                                                                                             |
| Wavelength                              | 0.71073 Å                                                                                            |
| Crystal system                          | Monoclinic                                                                                           |
| Space group                             | P2 <sub>1</sub> /n                                                                                   |
| Unit cell dimensions                    | a = 11.2530(13) Å    α = 90°.<br>b = 17.652(2) Å    β = 90.075(2)°.<br>c = 13.5982(15) Å    γ = 90°. |
| Volume                                  | 2701.2(5) Å <sup>3</sup>                                                                             |
| Z                                       | 4                                                                                                    |
| Density (calculated)                    | 1.701 Mg/m <sup>3</sup>                                                                              |
| Absorption coefficient                  | 0.965 mm <sup>-1</sup>                                                                               |
| F(000)                                  | 1412                                                                                                 |
| Crystal color                           | red                                                                                                  |
| Crystal size                            | 0.356 x 0.218 x 0.139 mm <sup>3</sup>                                                                |
| Theta range for data collection         | 1.890 to 28.760°                                                                                     |
| Index ranges                            | -15 ≤ h ≤ 15, -22 ≤ k ≤ 23, -17 ≤ l ≤ 17                                                             |
| Reflections collected                   | 31457                                                                                                |
| Independent reflections                 | 6588 [R(int) = 0.0528]                                                                               |
| Completeness to theta = 26.000°         | 100.0 %                                                                                              |
| Absorption correction                   | None                                                                                                 |
| Refinement method                       | Full-matrix least-squares on F <sup>2</sup>                                                          |
| Data / restraints / parameters          | 6588 / 0 / 370                                                                                       |
| Goodness-of-fit on F <sup>2</sup>       | 1.033                                                                                                |
| Final R indices [I > 2σ(I) = 5410 data] | R1 = 0.0349, wR2 = 0.0849                                                                            |
| R indices (all data, 0.73 Å)            | R1 = 0.0464, wR2 = 0.0912                                                                            |
| Extinction coefficient                  | n/a                                                                                                  |
| Largest diff. peak and hole             | 0.455 and -0.902 e.Å <sup>-3</sup>                                                                   |

**Table S4.** Crystal data and structure refinement for **3Ba**.

|                                         |                                                                                                       |                    |
|-----------------------------------------|-------------------------------------------------------------------------------------------------------|--------------------|
| Empirical formula                       | C <sub>26</sub> H <sub>27</sub> Ba Cl F <sub>6</sub> Fe N <sub>3</sub> O <sub>12</sub> S <sub>2</sub> |                    |
| Formula weight                          | 980.26                                                                                                |                    |
| Temperature                             | 88(2) K                                                                                               |                    |
| Wavelength                              | 0.71073 Å                                                                                             |                    |
| Crystal system                          | Triclinic                                                                                             |                    |
| Space group                             | P-1                                                                                                   |                    |
| Unit cell dimensions                    | a = 9.7023(6) Å                                                                                       | α = 106.9710(10)°. |
|                                         | b = 12.7853(7) Å                                                                                      | β = 104.4130(10)°. |
|                                         | c = 15.6368(9) Å                                                                                      | γ = 98.1780(10)°.  |
| Volume                                  | 1747.81(18) Å <sup>3</sup>                                                                            |                    |
| Z                                       | 2                                                                                                     |                    |
| Density (calculated)                    | 1.863 Mg/m <sup>3</sup>                                                                               |                    |
| Absorption coefficient                  | 1.826 mm <sup>-1</sup>                                                                                |                    |
| F(000)                                  | 970                                                                                                   |                    |
| Crystal color                           | black                                                                                                 |                    |
| Crystal size                            | 0.478 x 0.213 x 0.194 mm <sup>3</sup>                                                                 |                    |
| Theta range for data collection         | 1.431 to 29.074°                                                                                      |                    |
| Index ranges                            | -13 ≤ h ≤ 12, -17 ≤ k ≤ 16, 0 ≤ l ≤ 21                                                                |                    |
| Reflections collected                   | 8424                                                                                                  |                    |
| Independent reflections                 | 8424 [R(int) = ?]                                                                                     |                    |
| Completeness to theta = 26.000°         | 99.8 %                                                                                                |                    |
| Absorption correction                   | Semi-empirical from equivalents                                                                       |                    |
| Max. and min. transmission              | 0.745802 and 0.606257                                                                                 |                    |
| Refinement method                       | Full-matrix least-squares on F <sup>2</sup>                                                           |                    |
| Data / restraints / parameters          | 8424 / 0 / 471                                                                                        |                    |
| Goodness-of-fit on F <sup>2</sup>       | 1.077                                                                                                 |                    |
| Final R indices [I > 2σ(I) = 7898 data] | R1 = 0.0209, wR2 = 0.0571                                                                             |                    |
| R indices (all data, 0.73 Å)            | R1 = 0.0232, wR2 = 0.0582                                                                             |                    |
| Extinction coefficient                  | n/a                                                                                                   |                    |
| Largest diff. peak and hole             | 0.561 and -0.418 e.Å <sup>-3</sup>                                                                    |                    |

**Table S5.** Crystal data and structure refinement for **4K**. Connectivity ONLY

|                                         |                                                                                                                             |                   |
|-----------------------------------------|-----------------------------------------------------------------------------------------------------------------------------|-------------------|
| Empirical formula                       | C <sub>46</sub> H <sub>48</sub> F <sub>6</sub> Fe <sub>2</sub> K <sub>2</sub> N <sub>4</sub> O <sub>19</sub> S <sub>2</sub> |                   |
| Formula weight                          | 1328.90                                                                                                                     |                   |
| Temperature                             | 88(2) K                                                                                                                     |                   |
| Wavelength                              | 0.71073 Å                                                                                                                   |                   |
| Crystal system                          | Monoclinic                                                                                                                  |                   |
| Space group                             | C2/c                                                                                                                        |                   |
| Unit cell dimensions                    | a = 32.941(2) Å                                                                                                             | α = 90°.          |
|                                         | b = 8.2524(6) Å                                                                                                             | β = 108.3022(8)°. |
|                                         | c = 21.7664(15) Å                                                                                                           | γ = 90°.          |
| Volume                                  | 5617.7(7) Å <sup>3</sup>                                                                                                    |                   |
| Z                                       | 4                                                                                                                           |                   |
| Density (calculated)                    | 1.571 Mg/m <sup>3</sup>                                                                                                     |                   |
| Absorption coefficient                  | 0.834 mm <sup>-1</sup>                                                                                                      |                   |
| F(000)                                  | 2720                                                                                                                        |                   |
| Crystal color                           | red                                                                                                                         |                   |
| Crystal size                            | 0.429 x 0.312 x 0.185 mm <sup>3</sup>                                                                                       |                   |
| Theta range for data collection         | 1.302 to 28.779°                                                                                                            |                   |
| Index ranges                            | -42 ≤ h ≤ 44, -10 ≤ k ≤ 11, -29 ≤ l ≤ 29                                                                                    |                   |
| Reflections collected                   | 32509                                                                                                                       |                   |
| Independent reflections                 | 6863 [R(int) = 0.0198]                                                                                                      |                   |
| Completeness to theta = 25.500°         | 100.0 %                                                                                                                     |                   |
| Absorption correction                   | Semi-empirical from equivalents                                                                                             |                   |
| Max. and min. transmission              | 0.7458 and 0.6629                                                                                                           |                   |
| Refinement method                       | Full-matrix least-squares on F <sup>2</sup>                                                                                 |                   |
| Data / restraints / parameters          | 6863 / 0 / 337                                                                                                              |                   |
| Goodness-of-fit on F <sup>2</sup>       | 1.055                                                                                                                       |                   |
| Final R indices [I > 2σ(I) = 6128 data] | R1 = 0.0931, wR2 = 0.2677                                                                                                   |                   |
| R indices (all data, 0.74 Å)            | R1 = 0.0990, wR2 = 0.2740                                                                                                   |                   |
| Largest diff. peak and hole             | 2.931 and -1.625 e.Å <sup>-3</sup>                                                                                          |                   |

**Table S6.** Crystal data and structure refinement for **4Ba**.

|                                         |                                                                                                                      |
|-----------------------------------------|----------------------------------------------------------------------------------------------------------------------|
| Empirical formula                       | [C <sub>26</sub> H <sub>27</sub> Ba F <sub>6</sub> Fe N <sub>3</sub> O <sub>12.5</sub> S <sub>2</sub> ] <sub>∞</sub> |
| Formula weight                          | 952.81                                                                                                               |
| Temperature                             | 88(2) K                                                                                                              |
| Wavelength                              | 0.71073 Å                                                                                                            |
| Crystal system                          | Orthorhombic                                                                                                         |
| Space group                             | <i>Pbcm</i>                                                                                                          |
| Unit cell dimensions                    | a = 9.5075(4) Å      α = 90°.<br>b = 27.3543(12) Å    β = 90°.<br>c = 28.8412(12) Å    γ = 90°.                      |
| Volume                                  | 7500.8(6) Å <sup>3</sup>                                                                                             |
| Z                                       | 8                                                                                                                    |
| Density (calculated)                    | 1.687 Mg/m <sup>3</sup>                                                                                              |
| Absorption coefficient                  | 1.631 mm <sup>-1</sup>                                                                                               |
| F(000)                                  | 3776                                                                                                                 |
| Crystal color                           | orange                                                                                                               |
| Crystal size                            | 0.284 x 0.190 x 0.098 mm <sup>3</sup>                                                                                |
| Theta range for data collection         | 1.489 to 29.033°                                                                                                     |
| Index ranges                            | -12 ≤ h ≤ 12, -36 ≤ k ≤ 35, -37 ≤ l ≤ 39                                                                             |
| Reflections collected                   | 89405                                                                                                                |
| Independent reflections                 | 9791 [R(int) = 0.0457]                                                                                               |
| Completeness to theta = 25.500°         | 99.9 %                                                                                                               |
| Absorption correction                   | Numerical                                                                                                            |
| Max. and min. transmission              | 0.6566 and 0.4943                                                                                                    |
| Refinement method                       | Full-matrix least-squares on F <sup>2</sup>                                                                          |
| Data / restraints / parameters          | 9791 / 11 / 439                                                                                                      |
| Goodness-of-fit on F <sup>2</sup>       | 1.025                                                                                                                |
| Final R indices [I > 2σ(I) = 7734 data] | R1 = 0.0680, wR2 = 0.1813                                                                                            |
| R indices (all data, 0.73 Å)            | R1 = 0.0849, wR2 = 0.1950                                                                                            |
| Largest diff. peak and hole             | 3.301 and -2.011 e.Å <sup>-3</sup>                                                                                   |
